# Supplementary material
Source: PubMed Central journal article supplement (PMC10101911)
Supplement: NIHMS1876533-supplement-2.pdf [file NIHMS1876533-supplement-2.pdf]

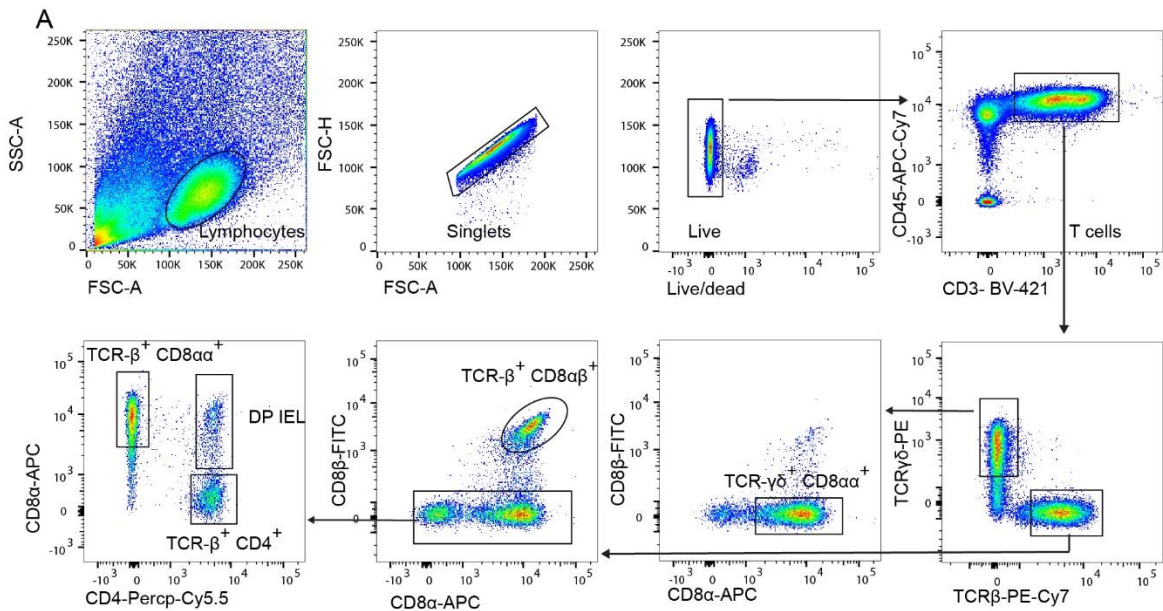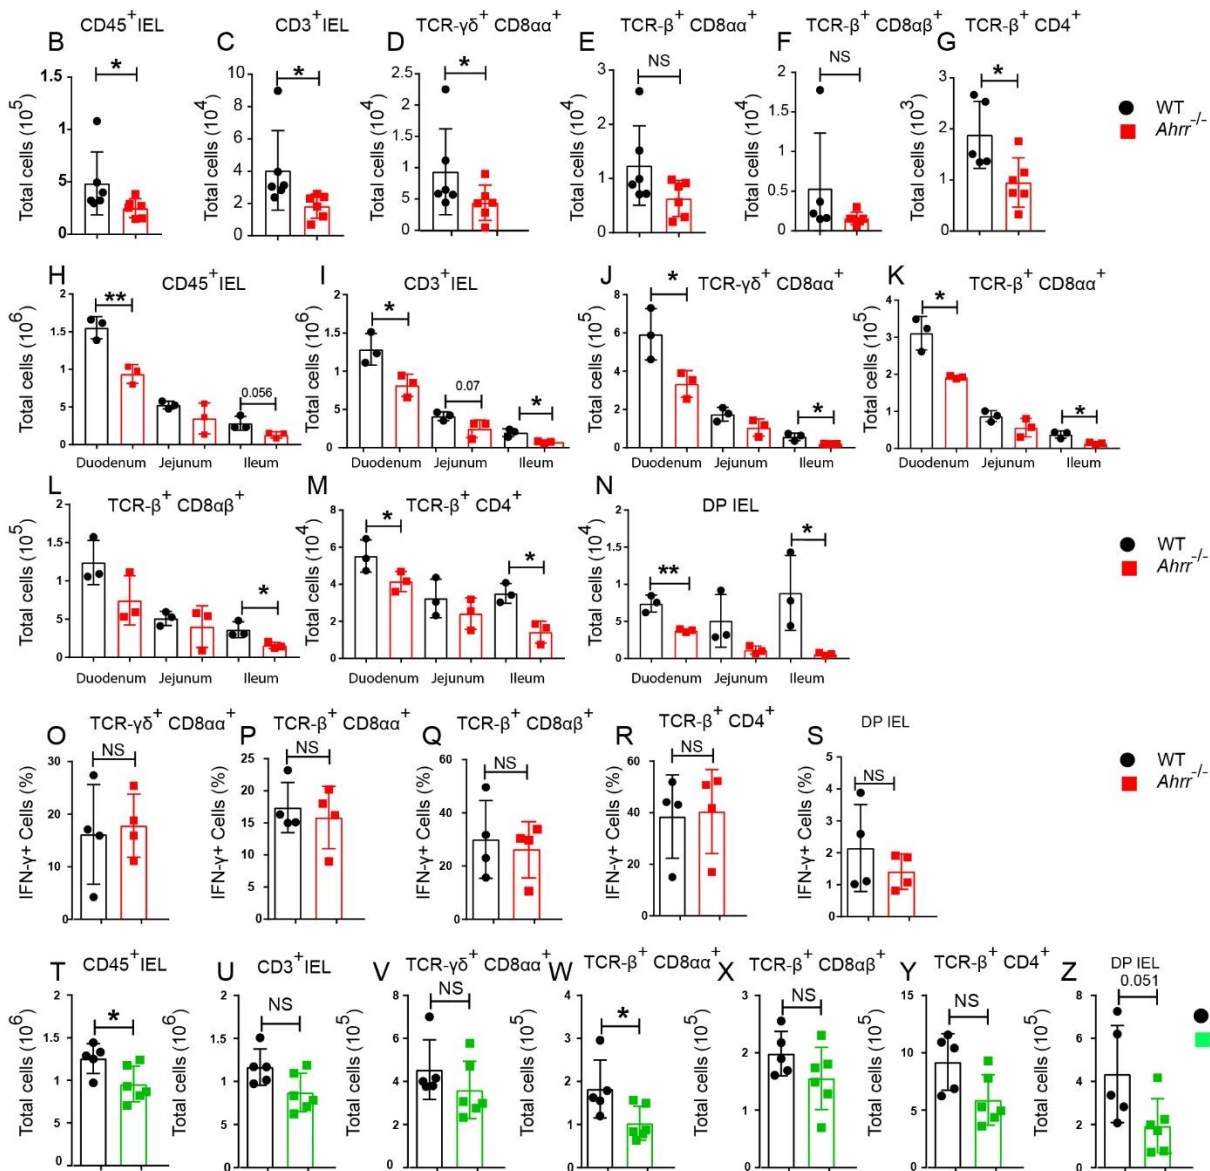

**Figure S1. *Ahrr*<sup>-/-</sup> mice have reduced numbers of colonic IEL, related to Figure 1.**

**(A)** Gating strategy for IEL-Lymphocyte sized live cells were gated for CD3 and CD45. CD45<sup>+</sup>, CD3<sup>+</sup> cells were further analyzed for expression of TCR $\gamma\delta$  and TCR $\alpha\beta$ . TCR $\gamma\delta$ <sup>+</sup> and TCR $\alpha\beta$ <sup>+</sup> cells were classified into different subsets of IEL based on expression of CD4, CD8 $\alpha$  and CD8 $\beta$  as indicated. **(B)** Numbers of CD45<sup>+</sup> IEL in the large intestine of WT and *Ahrr*<sup>-/-</sup> mice. **(C)** Numbers of T cells in the epithelium of the large intestine. **(D-F)** IEL populations in large intestine epithelium of WT and *Ahrr*<sup>-/-</sup> mice, including TCR- $\gamma\delta$ <sup>+</sup> CD8 $\alpha\alpha$ <sup>+</sup> **(D)**, TCR- $\beta$ <sup>+</sup> CD8 $\alpha\alpha$ <sup>+</sup> **(E)**, TCR- $\beta$ <sup>+</sup> CD8 $\alpha\beta$ <sup>+</sup> **(F)**, and TCR- $\beta$ <sup>+</sup> CD4<sup>+</sup> **(G)**. **(H-N)** IEL populations in proximal, intermediate and distal segments of the small intestine of WT and *Ahrr*<sup>-/-</sup> mice, including CD45<sup>+</sup> **(H)**, CD3<sup>+</sup> **(I)**, TCR- $\gamma\delta$ <sup>+</sup> CD8 $\alpha\alpha$ <sup>+</sup> **(J)**, TCR- $\beta$ <sup>+</sup> CD8 $\alpha\alpha$ <sup>+</sup> **(K)**, TCR- $\beta$ <sup>+</sup> CD8 $\alpha\beta$ <sup>+</sup> **(L)**, TCR- $\beta$ <sup>+</sup> CD4<sup>+</sup> **(M)** and DP IEL **(N)**. **(O-S)** Percentage of IFN- $\gamma$ <sup>+</sup> IEL in WT and *Ahrr*<sup>-/-</sup> mice. **(T-Z)** IEL populations in the small intestine of WT and *Ahrr*<sup>+/-</sup> mice, including CD45<sup>+</sup> **(T)**, CD3<sup>+</sup> **(U)**, TCR- $\gamma\delta$ <sup>+</sup> CD8 $\alpha\alpha$ <sup>+</sup> **(V)**, TCR- $\beta$ <sup>+</sup> CD8 $\alpha\alpha$ <sup>+</sup> **(W)**, TCR- $\beta$ <sup>+</sup> CD8 $\alpha\beta$ <sup>+</sup> **(X)**, TCR- $\beta$ <sup>+</sup> CD4<sup>+</sup> **(Y)** and DP IEL **(Z)**. Each dot represents an individual mouse. Data are representative of 2-3 individual experiments. Statistical significance was determined by Mann-Whitney test. \*P<0.05.

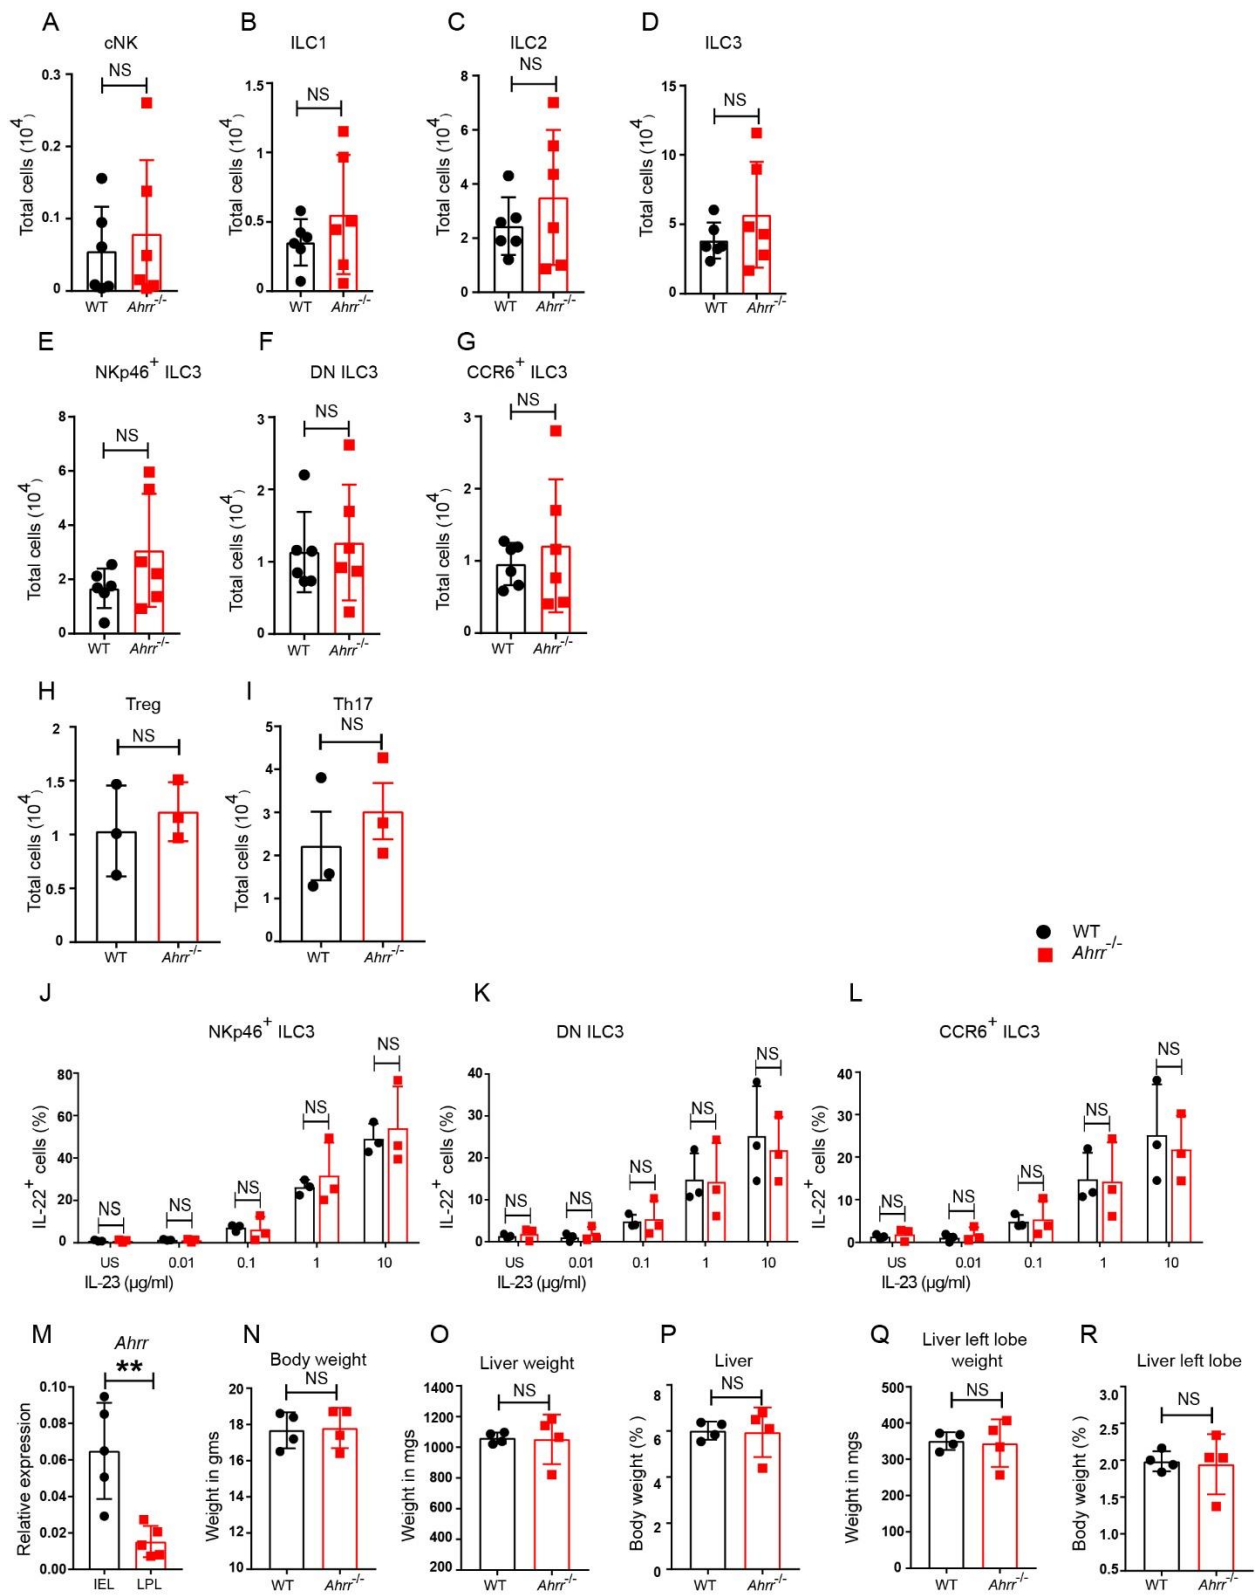

**Figure S2. ILC and liver are unaffected by *Ahrr* deficiency, related to Figure 1. (A-I)**

Absolute numbers of different cell populations in lamina propria of WT and *Ahrr*<sup>-/-</sup> mice: conventional NK cells (cNK) **(A)**, ILC1 **(B)**, ILC2 **(C)**, ILC3 **(D)**, NKp46<sup>+</sup> ILC3 **(E)**, NKp46<sup>-</sup> CCR6<sup>-</sup> **(F)**, CCR6<sup>+</sup> ILC3 **(G)**, Treg **(H)**, and Th17 **(I)** in the lamina propria of WT and *Ahrr*<sup>-/-</sup> mice remain comparable (gating strategy described in the method section). **(J-L)** IL-22 production by different subsets of ILC3 in response to IL-23 in-vitro. **(M)** Expression of *Ahrr* mRNA in IEL (CD8<sup>+</sup>) vs lamina propria T cells (CD8<sup>+</sup>). **(N-R)** analysis of livers of age- and sex-matched 8-10 weeks old WT and *Ahrr*<sup>-/-</sup> mice: body weight **(N)**, liver weight **(O)**, liver weight as percentage of body weight **(P)**, liver left lobe weight **(Q)** and liver left lobe weight as percentage of body weight **(R)**. Each dot represents an individual mouse. Data are representative of 2-3 individual experiments. Statistical significance was determined by Mann-Whitney test. \*P<0.05, \*\*P<0.01, \*\*\*P<0.001.

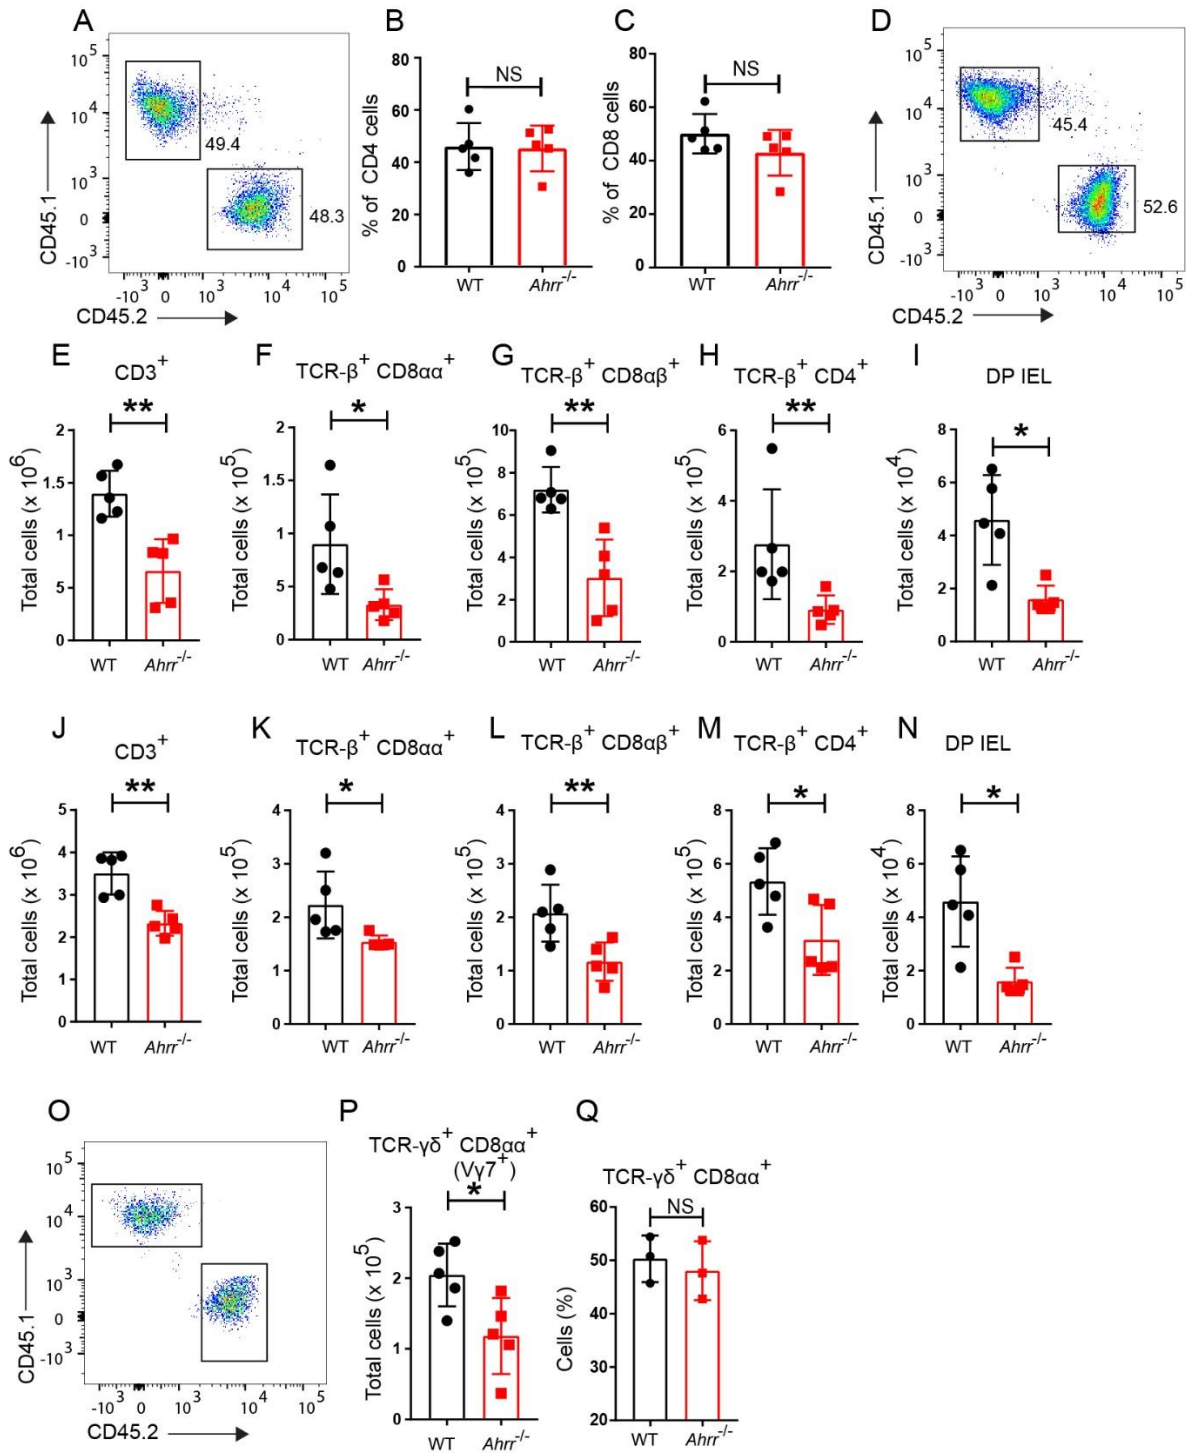

**Figure S3. Reconstitution of splenic T cells in mixed bone marrow chimeric mice, related to Figure 2.** Splenic T cells of chimeric mice reconstituted with bone marrow cells from WT (CD45.1) and *Ahrr*<sup>-/-</sup> (CD45.2) mice in 1:1 ratio. **(A)** Representative FACS plot showing splenic CD4<sup>+</sup> T cells. **(B,C)** Frequency of WT and *Ahrr*<sup>-/-</sup> splenic CD4 and CD8 T cells. **(D)** Representative FACS plot showing frequency of WT CD45.1 and *Ahrr*<sup>+/+</sup> CD45.2 CD4 IEL recovered from small intestine after adoptive transfer. **(E-I)** Numbers of small intestinal WT and *Ahrr*<sup>-/-</sup> CD3<sup>+</sup> IEL **(E)**, TCR-β<sup>+</sup> CD8αα<sup>+</sup> IEL **(F)**, TCR-β<sup>+</sup> CD8αβ<sup>+</sup> IEL **(G)**; TCR-β<sup>+</sup> CD4<sup>+</sup> IEL **(H)** and DP-IEL **(I)** recovered after adoptive transfer. **(J-N)** Numbers of small intestinal WT and *Ahrr*<sup>-/-</sup> CD3<sup>+</sup> IEL **(J)**, TCR-β<sup>+</sup> CD8αα<sup>+</sup> IEL **(K)**, TCR-β<sup>+</sup> CD8αβ<sup>+</sup> IEL **(L)**; TCR-β<sup>+</sup> CD4<sup>+</sup> IEL **(M)**; DP-IEL **(N)** recovered after bone marrow chimera. **(O)** FACS plot depicting frequency of WT CD45.1 and *Ahrr*<sup>+/+</sup> CD45.2 CD4 IEL recovered from small intestine after mix bone marrow chimera. **(P)** Numbers of TCR-γδ + CD8αα<sup>+</sup> (vγ7) IEL and **(Q)** Frequency of small intestinal WT and *Ahrr*<sup>-/-</sup> TCR-γδ + CD8αα<sup>+</sup> IEL recovered after bone marrow chimera. Each dot represents an individual mouse. Statistical significance was determined by Mann-Whitney test. \*P<0.05, \*\*P<0.01.

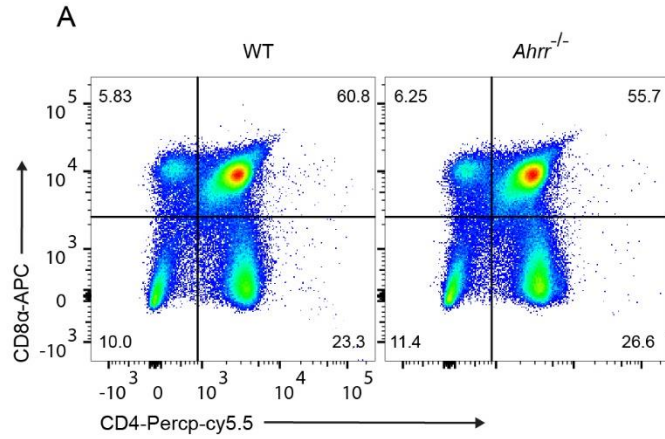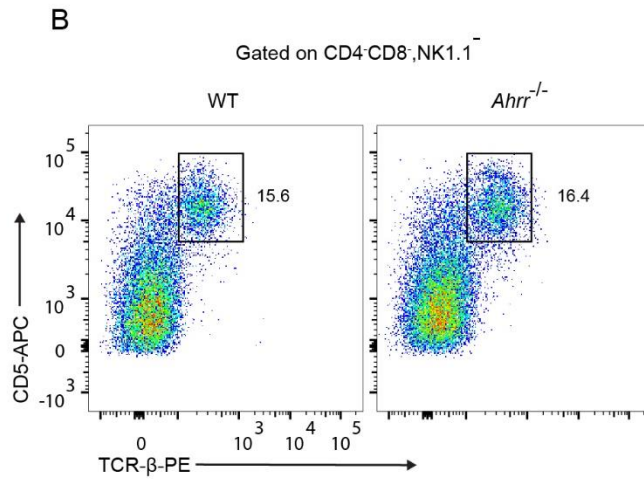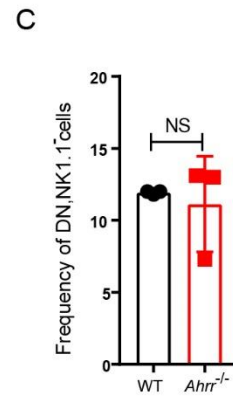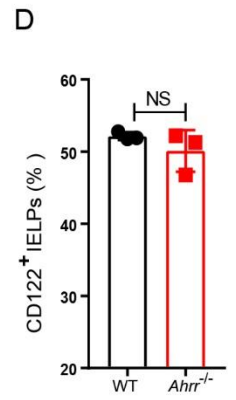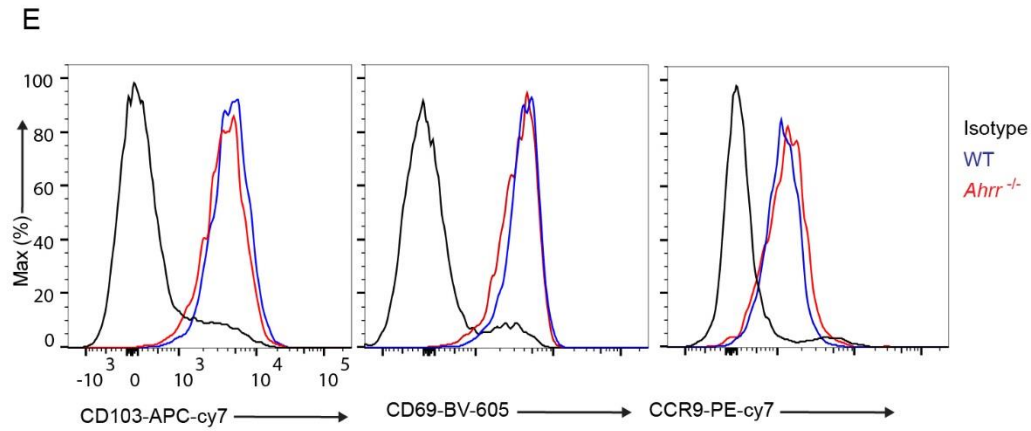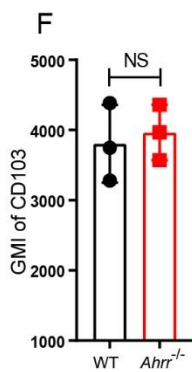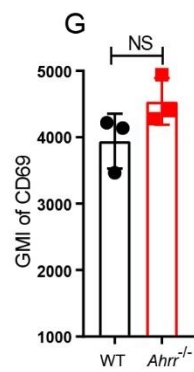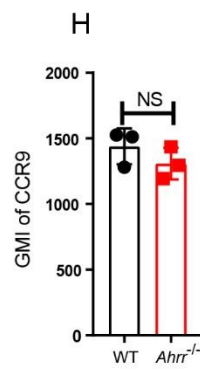

**Figure S4. IEL development and homing are independent of AHRR, related to Figures 1 and 2.** **(A)** FACS analysis of different CD4 and CD8 cell populations in thymus of WT and *Ahrr*<sup>-/-</sup> mice. **(B)** Representative FACS plots showing frequency of IELp in WT and *Ahrr*<sup>-/-</sup> mice. **(C,D)** Frequency of IELp and CD122<sup>+</sup>IELp in WT and *Ahrr*<sup>-/-</sup> mice. **(E-H)** Representative histograms **(E)** and GMI **(F,H)** of CD103, CD69 and CCR9 expression on DP IEL of WT and *Ahrr*<sup>-/-</sup> mice. Each dot represents an individual mouse. Data are representative of 2-3 individual experiments. Statistical significance was determined by Mann-Whitney test.



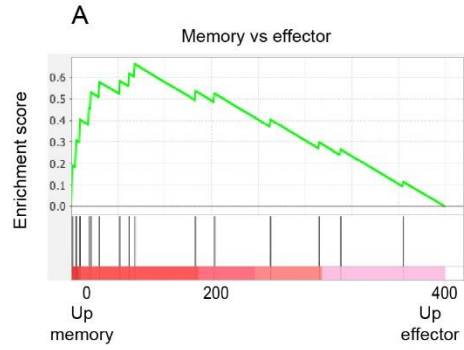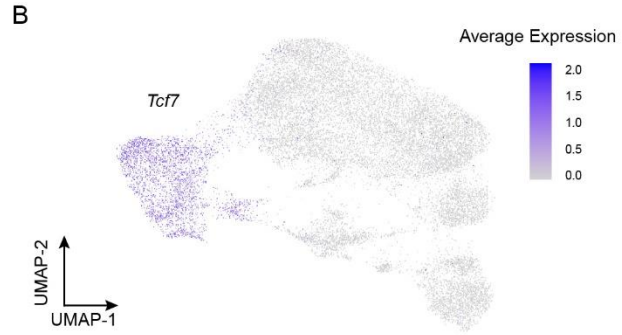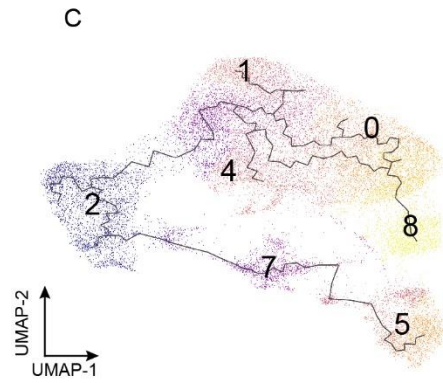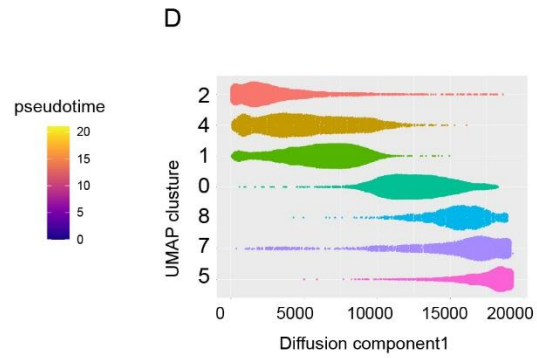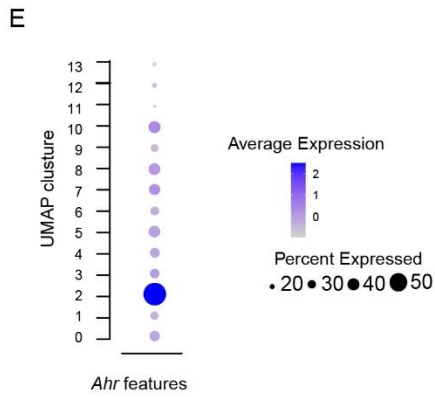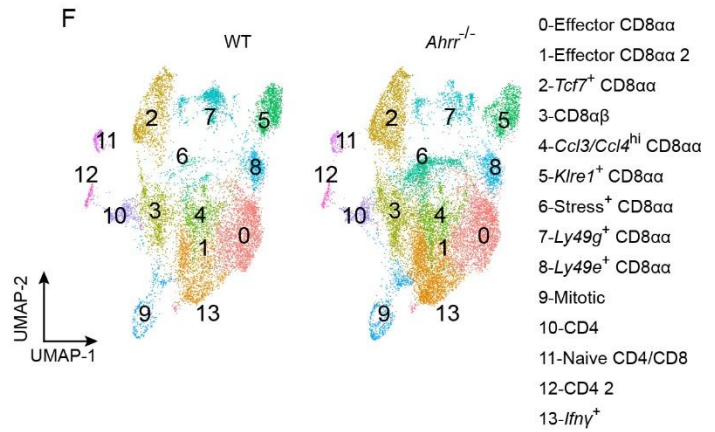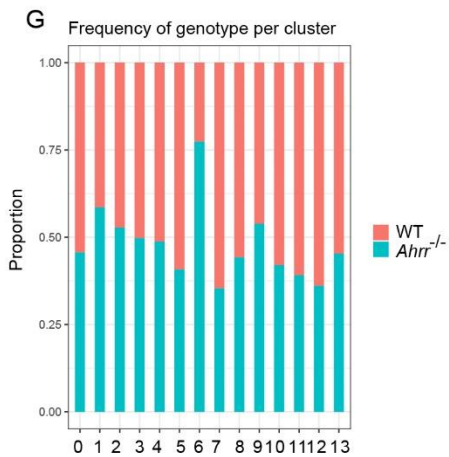

**Figure S5. A subset of IEL display memory precursor like phenotype, related to Figure 3. (A)** Gene set enrichment analysis for *Tcf7*<sup>+</sup> CD8αα<sup>+</sup> cells (cluster 2 described in **Figure 3A**). **(B,C)** UMAP and pseudo time trajectory analysis of *Tcf7* expression in IEL clusters. **(D)** IEL clusters ordered along diffusion component. **(E)** Comparative analysis of *Ahr* features in different IEL clusters. **(F,G)** UMAP plot and frequency of various populations of IEL from WT and *Ahr*<sup>-/-</sup> mice.

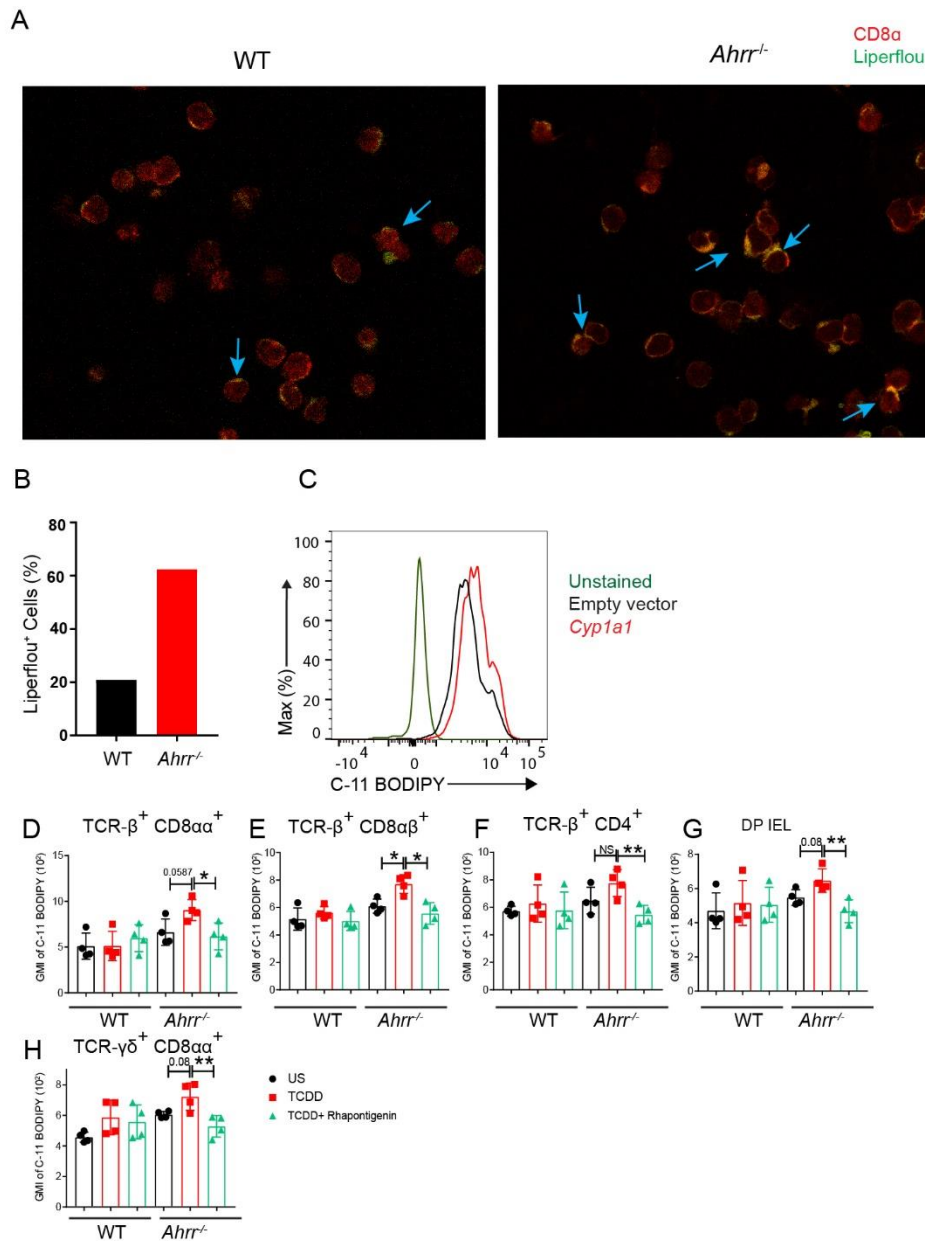

**Figure S6. AHRR deficiency induce ferroptosis in IEL, related to Figure. 4.** IEL from WT and *Ahrr*<sup>-/-</sup> mice were stained for CD8α and Liperflou. **(A)** Image showing Liperflou (green) staining of CD8α<sup>+</sup> cells (red). **(B)** % of Liperflou<sup>+</sup> cells. **(C)** Histograms depicting C-11 BODIPY staining of Jurkat cells transduced with *Cyp1a1* or vector only and unstained cells. The results are representative of two independent experiments. **(D-H)** C-11 BODIPY staining of WT and *Ahrr*<sup>-/-</sup> IEL upon TCDD stimulation with and without

Rhapontigenin in different IEL subsets. Each dot represents a mouse. Statistical significance was determined by Mann-Whitney test. \* $P < 0.05$ , \*\* $P < 0.01$ , \*\*\* $P < 0.001$ .

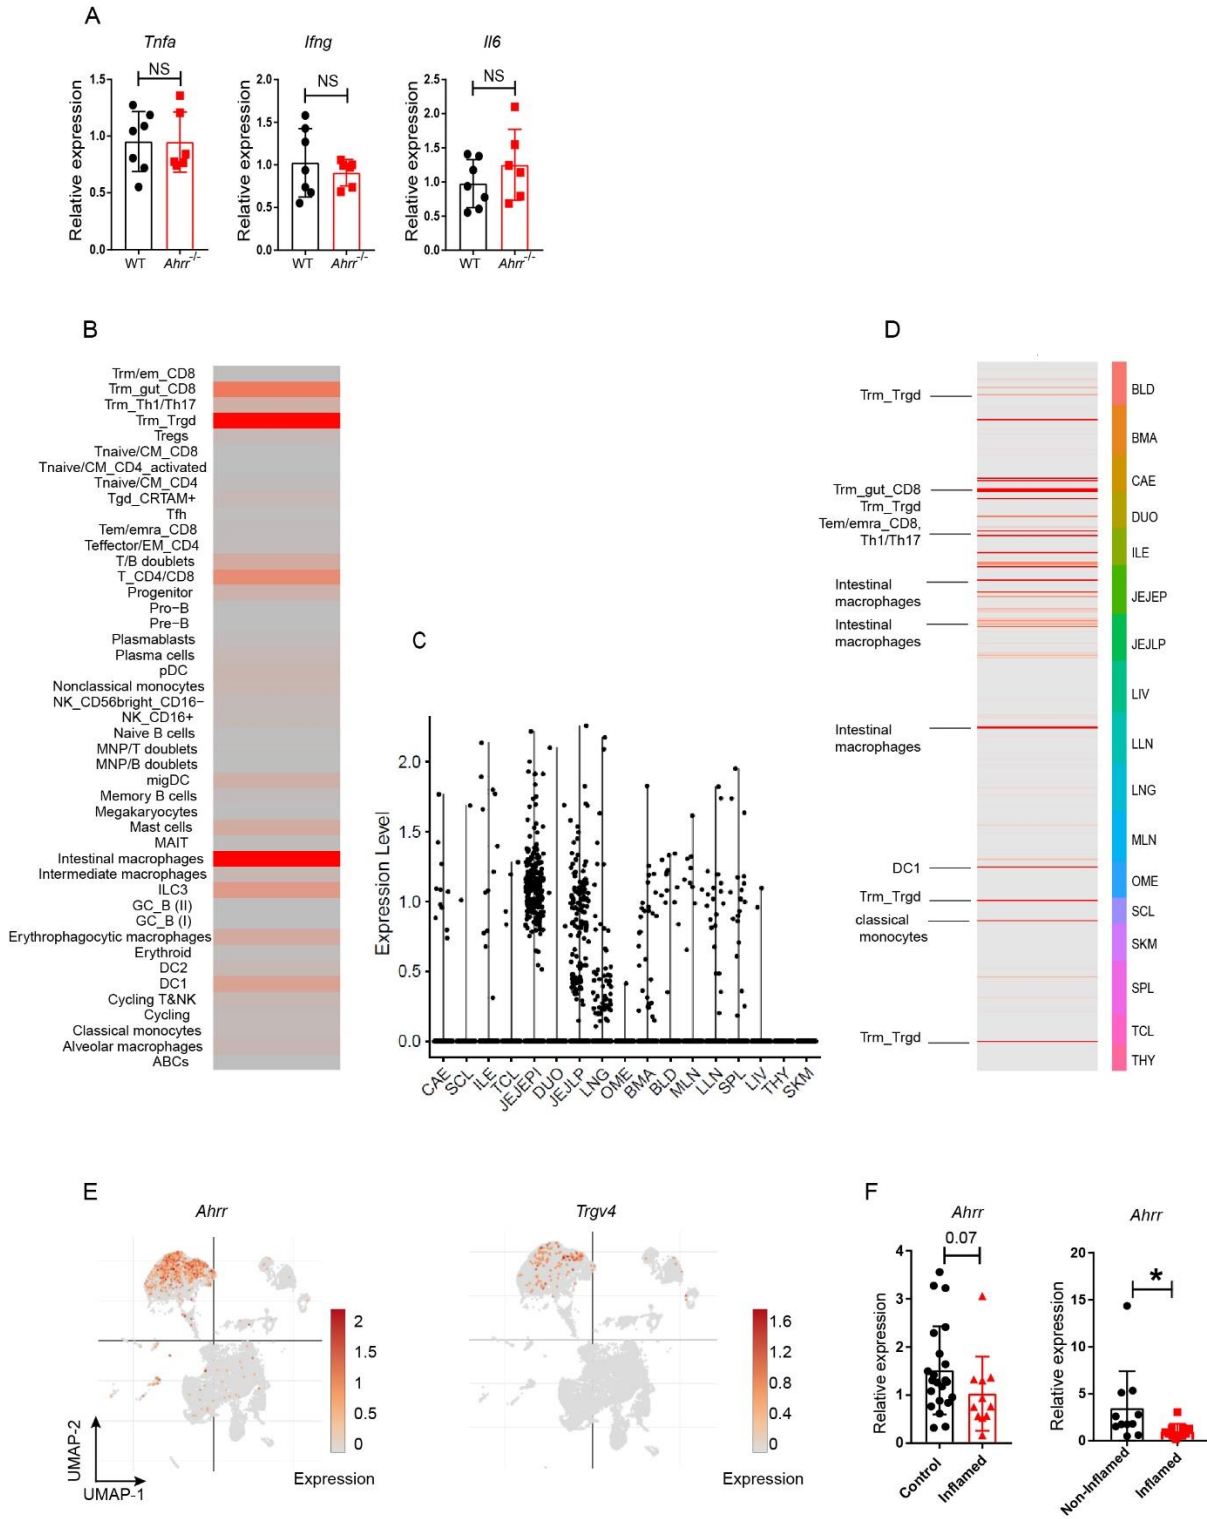

**Figure S7. AHRR impact and expression in mouse and human intestinal pathology, related to Figure 7. (A)** Spontaneous tissue inflammation is not induced in *Ahrr*<sup>-/-</sup> mice. Ileal tissues of WT and *Ahrr*<sup>-/-</sup> mice were analyzed for RNA levels of *Tnfa*, *Il6* and *Ifng*. Each dot represents an individual mouse. Data are from 2 individual experiments pooled. **(B)** Average *Ahrr* expression across all manually curated human cell types in the Cross-Tissue Immune Cell Atlas (CTICA). **(C)** Violin plot representing the scaled expression of *AHRR* across each human organ (all cell types combined); each dot represents a cell. **(D)** Average *Ahrr* expression across different cell types and across the human organs sequenced in the creation of the CTICA. Annotated are cell types in tissues that have very high expression. **(E)** Single cell analysis of digestive system enteropathies reveals a cluster of cells that expresses *Ahrr* and *Trgv4*, corresponding to *Ahrr*<sup>+</sup> intestinal  $\gamma\delta$  T cells; UMAP plots were extracted from the Broad Single Cell portal. **(F)** *Ahrr* expression in control (healthy), non-inflamed and inflamed tissues of IBD patients. Statistical significance was determined by Mann-Whitney test. \*P<0.05.
